# Supplementary material
Source: PubMed Central journal article supplement (PMC3992939)
Supplement: NIHMS565028-supplement-01.pdf [file NIHMS565028-supplement-01.pdf]

|               |                                                                                                                                                                                                                                                                   |
|---------------|-------------------------------------------------------------------------------------------------------------------------------------------------------------------------------------------------------------------------------------------------------------------|
| mse-miR-2b*   | Alk, Atg4LP, Atg6, Dredd/Caspase 6, Dsor1, FADD, galectin-4, Hdd1, hemocyte specific integrin $\alpha$ 1, HP14, HP4, HP5, IKK $\beta$ , Integrin $\beta$ 1, JAK/Hopscotch, Jra, leureptin-1, PPBP2, Pelle, PGRP-L5, PGRP-SA, Ras85D, Serrate, tetraspanin, Tollip |
| mse-miR-8*    | ANKRD54, Atg2, hemolectin, HP14, HP19, integrin related 1, TAK1, tyrosine hydroxylase, Vrille                                                                                                                                                                     |
| mse-miR-9a*   | Dscam, ECSIT, ERK, Hdd1, IML3, JAK/Hopscotch, Nimrod A, Pellino, PGRP-L2, protein phosphatase type 2c, Rac1, Rel2A, Rel2B                                                                                                                                         |
| mse-miR-9b*   | ERK, HP22, JAK/Hopscotch, Nimrod A, Pellino, PGRP-L2, protein phosphatase type 2c, Rac1, Rel2A, Rel2B                                                                                                                                                             |
| mse-miR-14*   | serpin4                                                                                                                                                                                                                                                           |
| mse-miR-31*   | Aos1, $\beta$ GRP2, Domeless, HP6, HP8, leureptin-1, PGRP-L2, secreted peptide 30                                                                                                                                                                                 |
| mse-miR-34*   | Atg12, Dsor1, ERK, hemocyte specific integrin $\alpha$ 1, integrin related 1, PPBP2, Pelle, PI6, MASK, Rel2B, tetraspanin, Tube                                                                                                                                   |
| mse-miR-71*   | Domeless, IML3, lebecinD, Licrone/MKK3, MLK1, MASK, Sickie, tetraspanin                                                                                                                                                                                           |
| mse-miR-79*   | HP12, JNK, Rac1, serpin6                                                                                                                                                                                                                                          |
| mse-miR-279a* | Caspar, cdc42, lysozyme, serpin4, Serrate                                                                                                                                                                                                                         |
| mse-miR-281*  | Domeless, hemolectin, Misshapen, Nuclear transport factor 2, serpin4                                                                                                                                                                                              |
| mse-miR-965*  | Atg4LP, hemocyte specific integrin $\alpha$ 2, JNK, Rel2B, tyrosine protein kinase                                                                                                                                                                                |
| mse-miR-2755* | Atg4LP, Dscam, ERK, FADD, Hdd13, HP6, serpin6, SPH4                                                                                                                                                                                                               |
| mse-miR-2766* | Dsor1, Licrone/MKK3                                                                                                                                                                                                                                               |

**Table 5.** miRNA:mRNA pairs with reverse profiles involved in extracellular signal transduction and melanization

| Target gene          | Putative regulatory miRNA                                   |
|----------------------|-------------------------------------------------------------|
| HP2                  | mse-miR-79                                                  |
| HP5                  | mse-miR-9a, -2b*                                            |
| HP6                  | mse-miR-12, -279d, -2766, -31*                              |
| HP7                  | mse-miR-9b, -316, -2766, -2767                              |
| HP8                  | mse-miR-308, -31*                                           |
| HP14                 | mse-miR-263a, -2763, -2767, -2b*, -8*                       |
| HP17                 | mse-miR-8, -9a                                              |
| HP19                 | mse-miR-307, -8*                                            |
| HP21                 | mse-miR-9a                                                  |
| HP22                 | mse-miR-9b, -9b*                                            |
| PAP2                 | mse-miR-9a, -71, -252                                       |
| PAP3                 | mse-miR-12, -2763                                           |
| SPH1                 | mse-miR-308                                                 |
| Serpin3              | mse-miR-12, -263a, -970                                     |
| Serpin4              | mse-miR-7, -9b, -11, -79, -263a, -308, -989, -let-7a, -281* |
| Serpin6              | mse-miR-11, -79*                                            |
| Serpin7              | mse-miR-308                                                 |
| tyrosine hydroxylase | mse-miR-8*                                                  |
| dopa decarboxylase   | mse-miR-6100                                                |
| Phe hydroxylase      | mse-miR-10a, -2763                                          |
| Punch                | mse-miR-9a, -71, -6100                                      |

**Table S1.** List of novel miRNA candidates\*

| Serial ID | Mature miRNA sequence  | CF | IF | CH | IH | Predicted precursor |        |        |        |          |
|-----------|------------------------|----|----|----|----|---------------------|--------|--------|--------|----------|
|           |                        |    |    |    |    | Scaffold            | Strand | Start  | End    | Energy** |
| t357780   | AAGCGGUAAUUGUUGUUGAG   | 0  | 1  | 0  | 0  | 00061               | minus  | 736483 | 736583 | -30.6    |
| t391850   | AAGUGUCAGGACGAGUUCUAGC | 1  | 0  | 8  | 3  | 00045               | minus  | 682268 | 682370 | -31.1    |
| t454580   | AAUCGGACAAGCAGUGCGAACG | 1  | 0  | 3  | 1  | 00639               | plus   | 98314  | 98415  | -38.5    |
| t614965   | ACAUAGGACUUUGUAAUUGCCA | 1  | 1  | 1  | 0  | 00349               | plus   | 245361 | 245463 | -33.8    |
| t721312   | ACGUAGGGAUGAGAUUGUGG   | 0  | 0  | 1  | 1  | 00431               | minus  | 3699   | 3802   | -29.4    |
| t1480635a | AUGCGCUGUAGCACGCGUGC   | 1  | 0  | 0  | 0  | 00152               | minus  | 47489  | 47588  | -49.3    |
| t1480635b | AUGCGCUGUAGCACGCGUGC   | 1  | 0  | 0  | 0  | 00152               | minus  | 410572 | 410671 | -49.1    |

|           |                         |    |    |    |    |       |       |         |         |        |
|-----------|-------------------------|----|----|----|----|-------|-------|---------|---------|--------|
| t1480635c | AUGCGCUGUAGCACGCGUGC    | 1  | 0  | 0  | 0  | 00060 | minus | 15843   | 15942   | -49.1  |
| t1566101  | AUGGAUGAAUUCAUAAAAU     | 42 | 1  | 1  | 0  | 00039 | minus | 465551  | 465649  | -23.8  |
| t1820768  | CAAUUGACUAGAGGAGAGUC    | 14 | 18 | 75 | 85 | 00034 | plus  | 1201689 | 1201787 | -39    |
| t1943004  | CAGCGAAUUGUUUGCGGCA     | 1  | 1  | 9  | 4  | 00001 | plus  | 1535457 | 1535556 | -69.5  |
| t2543141  | CGUACUGUGCCAUUGGAUAAUA  | 17 | 22 | 15 | 14 | 00123 | minus | 407746  | 407845  | -25.6  |
| t3057689  | GACAGAGAUUGUGGCAAGUCGUC | 0  | 1  | 0  | 0  | 00045 | plus  | 1412717 | 1412819 | -32.5  |
| t3301296  | GAUGUACUGACUGUUUCAUCGC  | 0  | 2  | 12 | 5  | 00355 | minus | 375346  | 375447  | -42.75 |
| t3923601  | GUAUGUCGGCUUUUGAAAUUGA  | 1  | 0  | 1  | 0  | 00201 | plus  | 540249  | 540350  | -44.2  |
| t4479723  | UACGUUCGCACUCGUUGCCGA   | 0  | 0  | 2  | 5  | 00639 | minus | 98333   | 98435   | -43.6  |
| t4577038  | UAGGAAGAUUACACACUCUGUGU | 0  | 1  | 0  | 1  | 00013 | minus | 1566602 | 1566702 | -29.67 |
| t4589761  | UAGGCGUUUCGCGACGACAAU   | 1  | 0  | 2  | 0  | 00030 | plus  | 1711190 | 1711291 | -25.1  |
| t4593803  | UAGGGCUAAUUAUCUCUCGC    | 0  | 0  | 1  | 0  | 00274 | plus  | 387655  | 387754  | -58.3  |
| t4695037  | UAUCUUCGUUGUAAUUGUCAU   | 5  | 3  | 3  | 2  | 00332 | plus  | 56774   | 56877   | -29.8  |
| t5253999  | UGAACUUUUUGCUUGGUAGAGG  | 0  | 2  | 0  | 0  | 08414 | plus  | 7       | 107     | -37.4  |
| t5758083  | UGUUGGAACGCAGGACAUACU   | 0  | 1  | 2  | 0  | 00097 | plus  | 500482  | 500584  | -34.34 |
| t5815605  | UUAAUGUAGUGAGAUUCGCGA   | 1  | 0  | 0  | 0  | 02545 | plus  | 1146    | 1247    | -34.8  |
| t5865555  | UUAGGAUUCCGAUGACUACUA   | 1  | 2  | 0  | 5  | 00079 | plus  | 311949  | 312049  | -34.8  |
| t5939672  | UUCAGACGCAUACAUAUUUU    | 0  | 0  | 0  | 1  | 00097 | minus | 639888  | 639989  | -54    |
| t6224666  | UUUACAAGUACGUCCGCCUUAAG | 0  | 0  | 0  | 1  | 00185 | plus  | 355167  | 355270  | -27    |
| t6233600a | UUUAGAGAUUUUUGAGCCAAA   | 0  | 0  | 0  | 2  | 00351 | minus | 25078   | 25179   | -40    |
| t6233600b | UUUAGAGAUUUUUGAGCCAAA   | 0  | 0  | 0  | 2  | 00351 | plus  | 25057   | 25158   | -40    |

\* The read counts are absolute values in the control (C) and induced (I) fat body (F) and hemocyte (H) libraries; \*\* Calculated free energy of fold back precursors.

**Table S2.** Abundance of conserved miRNA variants with no precursors identified\*

| miRNA name | Mature miRNA sequence    | CF    | IF   | CH   | IH   | IF/CF | IH/CH |
|------------|--------------------------|-------|------|------|------|-------|-------|
| miR-1      | UGGAAUGUAAAAGAAGUAUGUAG  | 84    | 26   | 8    | 2    | 0.31  | 0.25  |
| miR-1      | UGGAAUGUAAAAGAAGUAUGUAU  | 39    | 25   | 3    | 2    | 0.64  | 0.67  |
| miR-1      | UGGAAUGUAAAAGAAGUAUGUGA  | 39    | 24   | 3    | 2    | 0.62  | 0.67  |
| miR-1      | UGGAAUGUAAAAGAAGUAUGCGU  | 12    | 20   | 3    | 1    | 1.67  | 0.33  |
| miR-2      | UAUCACAGCCAGCUUUGAUGAGU  | 57    | 22   | 78   | 49   | 0.39  | 0.63  |
| miR-2      | UAUCACAGCCAGCUUUGAUGUGC  | 6     | 3    | 9    | 4    |       |       |
| miR-7      | UGGAAGACUAGUGAUUUUAUUGUU |       |      | 2    | 2    |       |       |
| miR-8      | UAAUACUGUCAGGUAAUGAUGUC  | 24    | 17   | 3    | 10   | 0.71  | 3.33  |
| miR-8      | UAAUACUGUUAGGUAAAAGUCC   |       | 2    |      | 1    |       |       |
| miR-13     | UAUCACAGCCAUUUUUGACGAGU  | 6     | 4    | 5    | 6    |       |       |
| miR-13     | UAUCACAGCCACUUUGAUGUG    |       | 2    | 1    |      |       |       |
| miR-31     | GGCAAGAAGUCGGCAUAGCUG    | 105   | 14   | 87   | 56   | 0.13  | 0.64  |
| miR-31     | AGGCAAGAUGUCGGCAUAGCUGA  | 36    | 4    | 52   | 26   | 0.11  | 0.50  |
| miR-33     | GUGCAUUGUAGUUGCAUUGCAU   | 165   | 79   | 93   | 45   | 0.48  | 0.48  |
| miR-33     | GUGCAUUGUAGUUGCAUUGC     | 36    | 33   | 28   | 10   | 0.92  | 0.36  |
| miR-33     | GUGCAUUGUAGUUGCAUUG      | 12    | 19   | 14   | 8    | 1.58  | 0.57  |
| miR-34     | UGGCAGUGUGGUUAGCUGGUAGU  | 24    | 15   | 15   | 35   | 0.63  | 2.33  |
| miR-71     | UGAAAGACAUGGGUAGUGAGAUU  | 504   | 192  | 637  | 750  | 0.38  | 1.18  |
| miR-71     | AGAAAGACAUGGGUAGUGAGAU   | 15    | 8    | 16   | 15   | 0.53  | 0.94  |
| miR-71     | UGAAAGACAUGGGUAGUGAGACG  | 51    | 35   | 99   | 125  | 0.69  | 1.26  |
| miR-79     | UAAAGCUAGAUUACCAAAGCAU   |       | 11   | 8    | 6    |       | 0.75  |
| miR-100    | AACCCGUAGAUCGGAACUUGUGU  | 84    | 39   | 69   | 22   | 0.46  | 0.32  |
| miR-124    | UUAAGGCACGCGGUGAAUGCCA   |       | 2    |      |      |       |       |
| miR-133    | UUGGUCCCCUUAACACAGCUGC   |       | 1    |      |      |       |       |
| miR-133    | UUGGUCCCCUUAACACAGCUA    |       | 1    |      |      |       |       |
| miR-133    | UUUGGUCCCCUUAACACAGCUAU  |       | 1    |      |      |       |       |
| miR-184    | UGGACGGAGAACUGAUAAAGGGU  | 10672 | 3093 | 9647 | 8586 | 0.29  | 0.89  |
| miR-184    | UGGACGGAGAACUGAUAAAGGCU  | 2745  | 1093 | 2476 | 1737 | 0.40  | 0.70  |

|              |                            |      |      |      |       |      |      |
|--------------|----------------------------|------|------|------|-------|------|------|
| miR-184      | UGGACGGAGAACUGAUAAAGGA     | 21   | 7    | 13   | 6     | 0.33 | 0.46 |
| miR-184      | UGGACGGAGAAUUGAUAGGGU      | 57   | 18   | 48   | 65    | 0.32 | 1.35 |
| miR-184      | UGGACGGAGAACUGAUAGGGC      | 24   | 5    | 13   | 13    | 0.21 | 1.00 |
| miR-252      | AUAAGUACUAGUGCCGCAGGAG     | 30   | 3    | 3    | 7     | 0.10 | 2.33 |
| miR-252      | CUAAGUACUAGUGCCGCAGGUGU    | 6    | 11   | 1    | 9     | 1.83 | 9.00 |
| miR-263      | AAUGGCACUGAAAGAAUUCACGGG   | 3    | 1    |      |       |      |      |
| miR-274      | GUUUGUGACCGUCACUAACGGGCAGU | 66   | 58   | 14   | 10    | 0.88 | 0.71 |
| miR-276      | UAGGAACUUAUACCGUGCUCU      | 3    |      |      |       |      |      |
| miR-305      | AUUGUACUUAUCAGGUGCUCUGG    | 90   | 71   | 63   | 202   | 0.79 | 3.21 |
| miR-305      | AUUGUACUUAUCAGGUGCUCUG     | 81   | 69   | 55   | 197   | 0.85 | 3.58 |
| miR-305      | GGCGCUUGUUGGAGUACACUU      |      | 3    |      | 8     |      |      |
| miR-306      | CAGAGCCGCCUCGUGCCUCAG      |      | 3    | 1    | 1     |      |      |
| miR-317      | UGAACACAGCUGGUGGUUAUACAGU  |      | 4    | 21   | 7     |      | 0.33 |
| miR-750      | AGUUGGACAGGGGAUCUUGACA     |      |      |      | 2     |      |      |
| miR-927      | UUUUAGAAUCCUACGCUUUACC     | 39   | 64   | 29   | 17    | 1.64 | 0.59 |
| miR-932      | UCAAUUCCGUAGUGCAUUGCAG     |      | 1    | 2    | 1     |      |      |
| miR-970      | UCAUAAGACACACGCGGCUAU      | 1233 | 2509 | 4491 | 13088 | 2.03 | 2.91 |
| miR-989      | UGUGAUGGACGUAGUGGAACA      | 3    |      | 2    |       |      |      |
| miR-989      | UGUGAUGGACGUAGUGGUAC       | 3    |      |      |       |      |      |
| miR-1175     | UGAGAUUCAACUCCUCCAACUGC    |      | 1    |      |       |      |      |
| miR-1175     | UGAGAUUCAACUCCUCCAACUUA    | 9    | 3    | 13   | 3     | 0.33 | 0.23 |
| miR-1959     | GGGAUGUAGCUCAGUGGAG        | 24   | 2    | 3    | 1     | 0.08 | 0.33 |
| miR-2478     | GUAUCCACUUCUGACACCA        | 15   | 7    | 33   | 8     | 0.47 | 0.24 |
| miR-2795     | CAAGUUUGGUGAUACGCGGGCGC    | 15   | 15   | 59   | 89    | 1.00 | 1.51 |
| mse-bantam-b | UGAGAUCAUUGUGAAAGCUAU      | 12   | 18   | 13   | 7     | 1.50 | 0.54 |
| mse-bantam-c | UGAGAUCAUUGUGAAAGCUGAUU    |      | 8    | 8    | 4     |      |      |
| mse-let-7b   | UGAGGUAGUAGGUUGUGUGGUU     | 3    | 1    |      | 1     |      |      |
| mse-let-7c   | UGAGGUAGUAGGUUGUAUGGUU     | 141  | 93   | 220  | 117   | 0.66 | 0.53 |
| mse-let-7d   | AGAGGUAGUAGGUUGCAUAGU      |      |      |      | 1     |      |      |
| mse-let-7e   | UGAGGUAGGAGGUUGUAUAGU      |      |      | 5    | 1     |      |      |
| mse-let-7f   | UGAGGUAGUUGGUUGUAUAGU      |      | 2    | 5    | 6     |      |      |
| mse-let-7g   | UGAGGUAGUAGUUUGUAUAGUU     |      | 6    | 2    | 3     |      |      |
| mse-let-7h   | UGAGGUAGGAGGUUGUAUAGUU     |      |      | 5    | 1     |      |      |
| mse-let-7i   | AGAGGUAGUAGGUUGCAUAGUU     |      |      |      | 1     |      |      |
| mse-let-7j   | UGAGGUAGUAGGUUGUUUAGUU     | 3    | 2    | 2    | 4     |      |      |

\* Abundance is shown with normalized read numbers (reads per million) in the control (C) and induced (I) fat body (F) and hemocyte (H) libraries. Read numbers are not shown for those either non-detectable or whose values are below 0.5 after normalization. Up ( $I/C > 1.25$ ) and down ( $I/C < 0.80$ ) regulated ones are shaded orange and green, respectively.

## Figure legends

**Fig. 1.** Size distributions of numbers of the total (red bars, left y-axis) and unique (black bars columns, right y-axis) reads in the four libraries combined.

**Fig. 2.** Predicted stem-loop structures of novel *M. sexta* miRNAs. The precursor sequences are retrieved from the genome based on the loci of mature and star strands (Section 2.2), with the mature ones shown in bold red capital letters.

**Fig. 3.** One cluster of novel miRNAs. A) Alignment of the mature miRNA sequences with identical residues labeled “|”. B) alignment of the miRNA precursor sequences with different
